# Supplementary material for: Exploring intentional medication non-adherence in patients with systemic lupus erythematosus: the role of physician–patient interactions
Source: PubMed Central journal article supplement (PMC7878846; doi:10.1093/rap/rkaa078), 2021-01-24
Supplement: rkaa078_supplementary_data.pdf [file rkaa078_supplementary_data.pdf]

## **Supplementary Data S1. Interview guide**

- 1.) Do you have any questions for me about the purpose or goals of this study?
- 2.) How would you define Lupus?
- 3.) What is unique to Lupus compared to other illnesses?
- 4.) How long did it take for you to become diagnosed with Lupus?
  - a. How many doctors did you see during that time?
- 5.) What were the obstacles in the diagnosis process?
- 6.) How has Lupus affected your everyday life?
- 7.) How has Lupus affected your family life?
- 8.) How has Lupus affected your social relationships?
- 9.) How has Lupus affected your employment?
- 10.) How do you think other people perceive Lupus?
- 11.) Do you know other people with Lupus?
- 12.) Discussion Topic: Obstacles that you have encountered related to your illness
